# Supplementary material
Source: HighWire-hosted journal article supplement (https://bmjopen.bmj.com/content/14/3/e082668)
Supplement: inline-supplementary-material-1 [file inline-supplementary-material-1.pdf]

**Supplementary Table 1:** Parameters for extracting potential Low Back Pain presentations using the Emergency Department (ED).

| Code                                                                                                                           | Explanatory Description                   |
|--------------------------------------------------------------------------------------------------------------------------------|-------------------------------------------|
| <b>Presenting Complaint</b>                                                                                                    |                                           |
| 17005                                                                                                                          | Requesting Investigation                  |
| 17006                                                                                                                          | Requesting Medication/Certificate/Results |
| 17008                                                                                                                          | Unplanned ED Representation               |
| 21002                                                                                                                          | Altered Sensation                         |
| 25005                                                                                                                          | Back Pain                                 |
| 9047                                                                                                                           | Mechanical Strain                         |
| <b>Primary ICD-10 AM Diagnosis Code</b>                                                                                        |                                           |
| G95.9                                                                                                                          | Disease of Spinal Cord, Unspecified       |
| M13.99                                                                                                                         | Arthritis, Unspecified                    |
| M19.99                                                                                                                         | Arthrosis, Unspecified                    |
| M25.59                                                                                                                         | Pain in a Joint, Site Unspecified         |
| M25.99                                                                                                                         | Unspecified Joint Disorder                |
| M48.99                                                                                                                         | Unspecified Spondylopathy                 |
| M51.9                                                                                                                          | Intervertebral Disc Disorder              |
| M53.3                                                                                                                          | Sacro Coccygeal Disorders                 |
| M53.99                                                                                                                         | Unspecified Dorsopathy                    |
| M54.19                                                                                                                         | Radiculopathy, Site Unspecified           |
| M54.2                                                                                                                          | Cervicalgia                               |
| M54.3                                                                                                                          | Sciatica                                  |
| M54.5                                                                                                                          | Low Back Pain                             |
| M54.6                                                                                                                          | Pain in Thoracic Spine                    |
| M54.99                                                                                                                         | Unspecified Dorsalgia Site Unspecified    |
| M79.19                                                                                                                         | Myalgia, Site Unspecified                 |
| M79.29                                                                                                                         | Neuralgia and Neuritis, Unspecified       |
| M89.99                                                                                                                         | Unspecified Disorder of Bone              |
| M95.9                                                                                                                          | Acquired Musculo Skeletal Deformity       |
| R25.2                                                                                                                          | Cramp and Spasm                           |
| R26.8                                                                                                                          | Abnormalities of Gait and Mobility        |
| R29.89                                                                                                                         | Musculo Skeletal System Symptoms / Signs  |
| R52.9                                                                                                                          | Pain, Unspecified                         |
| S22.00                                                                                                                         | Fracture of Thoracic Vertebra             |
| S23.3                                                                                                                          | Sprain and Strain of Thoracic Spine       |
| S32.00                                                                                                                         | Fracture of Lumbar Vertebra               |
| S32.82                                                                                                                         | Fracture of Lumbosacral Spine             |
| S33.3                                                                                                                          | Dislocation Lumbar Spine and Pelvis       |
| S33.7                                                                                                                          | Sprain/Strain Lumbar Spine/Pelvis         |
| S34.1                                                                                                                          | Other Injury of Lumbar Spinal Cord        |
| S38.1                                                                                                                          | Crush Injury Abdomen/Lower Back/Pelvis    |
| S39.9                                                                                                                          | Injury of Abdomen/Lower Back/Pelvis       |
| Z02.7                                                                                                                          | Issue of Medical Certificate              |
| Z04.9                                                                                                                          | Examination / Observation Unspecified     |
| Z76.0                                                                                                                          | Issue of Repeat Prescription              |
| Note: Codes and descriptions relate to the intervention ED location of FASTRACK and control ED location of BLUE or GREEN ZONE. |                                           |
